# Supplementary material for: Conditional Survival and Associated Prognostic Factors in Patients with Upper Tract Urothelial Carcinoma after Radical Nephroureterectomy: A Retrospective Study at a Single Institution
Source: PubMed Central journal article supplement — Cancer Res Treat. 2015 Sep 9;48(2):621–31. doi: 10.4143/crt.2015.220 (PMC4843715; doi:10.4143/crt.2015.220), 2015-09-09
Supplement: crt-2015-220-supple.pdf [file crt-2015-220-supple.pdf]

# Conditional Survival and Associated Prognostic Factors in Patients with Upper Tract Urothelial Carcinoma after Radical Nephroureterectomy: A Retrospective Study at a Single Institution

**Minyong Kang, MD, PhD<sup>1</sup>, Hyung Suk Kim, MD<sup>2</sup>, Chang Wook Jeong, MD, PhD<sup>2</sup>,  
Cheol Kwak, MD, PhD<sup>2</sup>, Hyeon Hoe Kim, MD, PhD<sup>2</sup>, Ja Hyeon Ku, MD, PhD<sup>2</sup>**

<sup>1</sup>Department of Urology, Seoul National University Bundang Hospital, Seongnam,

<sup>2</sup>Department of Urology, Seoul National University Hospital, Seoul, Korea

## Supplementary Data

### Table of Contents

|                             |   |
|-----------------------------|---|
| Supplementary Table 1 ..... | 2 |
| Supplementary Table 2 ..... | 2 |
| Supplementary Table 3 ..... | 2 |
| Supplementary Table 4 ..... | 3 |
| Supplementary Table 5 ..... | 5 |
| Supplementary Table 6 ..... | 7 |

**Supplementary Table 1.** Conditional cancer-specific survival (CSS) for additional periods by time since surgery

| Years survived after surgery<br>(No. at risk) | Conditional CSS (95% confidence interval, %) |                  |                  |                  |                  |
|-----------------------------------------------|----------------------------------------------|------------------|------------------|------------------|------------------|
|                                               | 1 yr                                         | 2 yr             | 3 yr             | 4 yr             | 5 yr             |
| 0 yr (330)                                    | 95.4 (94.2-96.6)                             | 89.8 (88.1-91.5) | 84.2 (82.1-86.3) | 78.8 (76.5-81.1) | 73.7 (71.1-76.3) |
| 1 yr (309)                                    | 94.1 (92.8-95.4)                             | 88.3 (86.4-90.2) | 82.6 (80.4-84.8) | 77.2 (74.6-79.8) | 74.7 (72.0-77.4) |
| 2 yr (287)                                    | 93.8 (92.3-95.3)                             | 87.8 (85.8-89.8) | 82.0 (79.5-84.5) | 79.3 (76.6-82.0) | 77.4 (74.6-80.2) |
| 3 yr (244)                                    | 93.6 (92.0-95.2)                             | 87.5 (85.2-89.8) | 84.6 (82.1-87.1) | 82.5 (79.8-85.2) | 80.9 (78.0-83.8) |
| 4 yr (196)                                    | 93.5 (91.7-95.3)                             | 90.4 (88.2-92.6) | 88.2 (85.7-90.7) | 86.4 (83.7-89.1) | 84.5 (81.5-87.5) |
| 5 yr (163)                                    | 97.4 (96.1-98.7)                             | 94.3 (92.3-96.3) | 92.5 (90.2-94.8) | 90.4 (87.7-93.1) | 90.4 (87.7-93.1) |

**Supplementary Table 2.** Conditional overall survival (OS) for additional periods by time since surgery

| Years survived after surgery<br>(No. at risk) | Conditional OS (95% confidence interval, %) |                  |                  |                  |                  |
|-----------------------------------------------|---------------------------------------------|------------------|------------------|------------------|------------------|
|                                               | 1 yr                                        | 2 yr             | 3 yr             | 4 yr             | 5 yr             |
| 0 yr (330)                                    | 93.9 (91.4-96.4)                            | 87.5 (84.0-91.0) | 79.7 (75.4-84.0) | 74.2 (69.3-79.1) | 67.9 (62.6-73.2) |
| 1 yr (309)                                    | 93.2 (90.5-95.9)                            | 84.8 (80.7-88.9) | 79.0 (74.3-83.7) | 72.3 (67.0-77.6) | 69.9 (64.4-75.4) |
| 2 yr (287)                                    | 91.0 (87.7-94.3)                            | 84.8 (80.5-89.1) | 77.6 (72.2-82.7) | 75.0 (69.5-80.5) | 72.6 (66.7-78.5) |
| 3 yr (244)                                    | 93.1 (89.8-96.4)                            | 85.2 (80.5-92.4) | 82.4 (79.7-89.9) | 79.8 (74.1-85.5) | 77.5 (71.2-83.8) |
| 4 yr (196)                                    | 91.5 (87.6-95.4)                            | 88.5 (83.8-93.2) | 85.6 (80.3-90.9) | 83.2 (77.3-89.1) | 79.4 (72.7-86.1) |
| 5 yr (163)                                    | 96.7 (93.8-99.6)                            | 93.6 (89.5-97.7) | 90.9 (86.0-95.8) | 86.7 (80.4-93.0) | 83.0 (75.7-90.3) |

**Supplementary Table 3.** Conditional intravesical recurrence-free survival (IVRFS) for additional periods by time since surgery

| Years survived after surgery<br>(No. at risk) | Conditional IVRFS (95% confidence interval, %) |                  |                  |                   |                   |
|-----------------------------------------------|------------------------------------------------|------------------|------------------|-------------------|-------------------|
|                                               | 1 yr                                           | 2 yr             | 3 yr             | 4 yr              | 5 yr              |
| 0 yr (330)                                    | 72.9 (70.4-75.4)                               | 62.1 (59.3-64.9) | 58.9 (56.0-61.8) | 57.2 (54.2-60.2)  | 56.5 (53.4-59.6)  |
| 1 yr (208)                                    | 85.3 (82.8-87.8)                               | 81.0 (78.1-83.9) | 79.6 (76.6-82.6) | 77.6 (74.4-80.8)  | 77.6 (74.4-80.8)  |
| 2 yr (145)                                    | 94.9 (93.0-96.8)                               | 93.3 (91.1-95.5) | 91.0 (88.3-93.7) | 91.0 (88.3-93.7)  | 91.0 (88.3-93.7)  |
| 3 yr (114)                                    | 98.2 (97.0-99.4)                               | 95.8 (93.7-97.9) | 95.8 (93.7-97.9) | 95.8 (93.7-97.9)  | 95.8 (93.7-97.9)  |
| 4 yr (91)                                     | 97.6 (95.9-99.3)                               | 97.6 (95.9-99.3) | 97.6 (95.9-99.3) | 97.6 (95.9-99.3)  | 94.6 (91.2-98.0)  |
| 5 yr (71)                                     | 100 (no events)                                | 100 (no events)  | 100 (no events)  | 97.0 (94.0-100.0) | 97.0 (94.0-100.0) |

**Supplementary Table 4.** Five-year conditional cancer-specific survival rates according to clinicopathological characteristics

| Variable                  | Years survived after surgery |          |          |          |           |           |
|---------------------------|------------------------------|----------|----------|----------|-----------|-----------|
|                           | Baseline                     | 1 yr     | 2 yr     | 3 yr     | 4 yr      | 5 yr      |
| Cohort                    | 330                          | 309      | 287      | 244      | 196       | 163       |
| Age (yr)                  |                              |          |          |          |           |           |
| < 65                      | 77.8±3.3                     | 78.0±3.4 | 80.2±3.4 | 83.6±3.4 | 88.5±3.2  | 94.1±2.6  |
| ≥ 65                      | 68.1±4.3                     | 69.9±4.6 | 73.1±4.9 | 76.5±5.2 | 77.8±5.9  | 84.0±5.7  |
| p-value                   | 0.012                        | 0.028    | 0.111    | 0.126    | 0.153     | 0.111     |
| Sex                       |                              |          |          |          |           |           |
| Male                      | 72.8±3.0                     | 74.3±3.1 | 75.7±3.3 | 79.4±3.3 | 84.2±3.3  | 91.0±2.9  |
| Female                    | 77.3±5.4                     | 76.1±5.7 | 83.9±5.3 | 86.8±5.7 | 86.2±6.6  | 88.4±6.4  |
| p-value                   | 0.699                        | 0.856    | 0.583    | 0.375    | 0.551     | 0.861     |
| BMI (kg/m <sup>2</sup> )  |                              |          |          |          |           |           |
| < 25                      | 67.8±3.7                     | 69.5±3.9 | 72.3±4.1 | 77.4±4.2 | 82.1±4.3  | 89.5±3.9  |
| ≥ 25                      | 81.6±3.6                     | 81.1±3.8 | 83.6±3.8 | 84.7±4.1 | 86.9±4.2  | 91.2±3.8  |
| p-value                   | 0.010                        | 0.037    | 0.048    | 0.200    | 0.382     | 0.722     |
| ASA score                 |                              |          |          |          |           |           |
| 0-1                       | 73.9±4.3                     | 75.0±4.5 | 77.4±4.7 | 83.4±4.5 | 88.4±4.2  | 94.0±3.4  |
| 2-3                       | 73.5±3.3                     | 74.5±3.4 | 77.4±3.6 | 79.5±3.8 | 82.5±4.0  | 88.6±3.6  |
| p-value                   | 0.842                        | 0.706    | 0.758    | 0.505    | 0.519     | 0.474     |
| History of bladder cancer |                              |          |          |          |           |           |
| Negative                  | 76.6±2.8                     | 77.0±2.9 | 77.9±3.1 | 82.7±3.1 | 85.3±3.2  | 90.0±2.9  |
| Positive                  | 60.3±7.1                     | 63.7±7.2 | 75.0±7.3 | 72.0±8.2 | 80.7±8.0  | 93.8±6.1  |
| p-value                   | 0.045                        | 0.036    | 0.592    | 0.174    | 0.407     | 0.537     |
| Ureteroscopy              |                              |          |          |          |           |           |
| Not done                  | 73.8±2.9                     | 75.6±3.0 | 79.3±3.0 | 84.1±3.0 | 88.7±2.9  | 93.9±2.4  |
| Done                      | 73.4±6.0                     | 71.1±6.4 | 70.5±7.0 | 69.9±7.5 | 70.5±8.0  | 78.5±7.9  |
| p-value                   | 0.419                        | 0.256    | 0.252    | 0.049    | 0.012     | 0.015     |
| Concomitant CIS           |                              |          |          |          |           |           |
| Negative                  | 74.0±2.8                     | 75.4±2.9 | 78.6±2.9 | 81.6±3.0 | 86.9±2.9  | 92.1±2.6  |
| Positive                  | 71.2±8.2                     | 69.3±8.6 | 68.2±9.6 | 76.1±9.6 | 65.2±13.0 | 74.7±13.7 |
| p-value                   | 0.404                        | 0.404    | 0.226    | 0.405    | 0.033     | 0.094     |
| Hydronephrosis            |                              |          |          |          |           |           |
| Negative                  | 79.0±3.3                     | 78.6±3.5 | 80.4±3.5 | 84.5±3.5 | 89.3±3.2  | 93.8±2.3  |
| Positive                  | 67.4±4.1                     | 69.8±4.3 | 73.4±4.6 | 76.0±4.9 | 78.0±5.4  | 85.7±5.1  |
| p-value                   | 0.009                        | 0.033    | 0.171    | 0.071    | 0.091     | 0.210     |
| Multifocal tumor          |                              |          |          |          |           |           |
| Negative                  | 75.4±2.8                     | 76.4±2.9 | 79.5±3.0 | 82.8±3.1 | 87.2±2.9  | 93.8±2.3  |
| Positive                  | 64.7±6.9                     | 65.8±7.3 | 67.0±7.6 | 72.3±8.0 | 75.4±8.8  | 78.2±8.7  |
| p-value                   | 0.021                        | 0.021    | 0.010    | 0.045    | 0.313     | 0.043     |
| Location                  |                              |          |          |          |           |           |
| Renal pelvis              | 79.4±3.4                     | 81.4±3.4 | 83.4±3.5 | 88.5±3.2 | 92.3±2.8  | 97.3±1.9  |
| Ureter                    | 69.7±4.6                     | 69.6±4.9 | 71.5±5.4 | 76.8±5.5 | 81.7±5.4  | 90.5±4.5  |
| Both                      | 63.7±7.6                     | 63.6±8.2 | 68.8±8.3 | 64.5±9.2 | 65.4±10.8 | 68.3±10.9 |
| p-value                   | 0.002                        | 0.005    | 0.010    | 0.002    | 0.025     | 0.002     |
| pT stage                  |                              |          |          |          |           |           |
| ≤ pT2                     | 86.1±2.8                     | 84.3±3.1 | 84.1±3.3 | 86.2±3.2 | 87.2±3.6  | 91.2±3.3  |
| ≥ pT3                     | 57.1±4.5                     | 60.5±4.8 | 66.3±5.1 | 71.6±5.6 | 79.5±5.4  | 88.9±4.8  |
| p-value                   | < 0.001                      | < 0.001  | < 0.001  | 0.029    | 0.128     | 0.691     |
| Tumor grade               |                              |          |          |          |           |           |
| Low                       | 90.2±3.0                     | 90.6±3.0 | 91.4±2.9 | 95.1±2.4 | 94.0±3.0  | 96.4±2.5  |
| High                      | 64.5±3.6                     | 65.3±3.8 | 64.0±4.5 | 70.9±4.5 | 77.0±4.7  | 85.1±4.4  |
| p-value                   | < 0.001                      | < 0.001  | < 0.001  | < 0.001  | 0.004     | 0.028     |

Supplementary Table 4. Continued

| Variable      | Years survived after surgery |           |           |           |           |          |
|---------------|------------------------------|-----------|-----------|-----------|-----------|----------|
|               | Baseline                     | 1 yr      | 2 yr      | 3 yr      | 4 yr      | 5 yr     |
| LVI           |                              |           |           |           |           |          |
| Negative      | 80.4±2.7                     | 79.7±2.8  | 81.1±2.9  | 83.7±3.0  | 86.4±3.2  | 90.5±2.9 |
| Positive      | 48.2±6.6                     | 53.1±7.2  | 59.1±8.1  | 66.4±8.4  | 74.5±8.5  | 90.0±6.8 |
| p-value       | 0.001                        | < 0.001   | 0.005     | 0.018     | 0.039     | 0.797    |
| Margin status |                              |           |           |           |           |          |
| Negative      | 75.7±2.6                     | 75.8±2.8  | 77.6±2.9  | 80.9±3.0  | 84.3±3.0  | 90.3±2.7 |
| Positive      | 26.2±12.8                    | 47.4±15.5 | 70.0±18.2 | 80.0±17.9 | -         | -        |
| p-value       | < 0.001                      | 0.001     | 0.421     | 0.790     | -         | -        |
| LN status     |                              |           |           |           |           |          |
| Negative      | 74.9±2.6                     | 75.8±2.8  | 77.6±2.9  | 81.2±3.0  | 84.6±3.0  | 90.2±2.7 |
| Positive      | 45.1±14.2                    | 48.6±14.8 | 72.9±16.5 | 72.9±16.5 | 83.3±15.2 | -        |
| p-value       | 0.009                        | 0.008     | 0.695     | 0.319     | 0.607     |          |
| ACH           |                              |           |           |           |           |          |
| Not done      | 81.9±2.7                     | 81.8±2.9  | 82.5±3.1  | 83.5±3.3  | 84.8±3.5  | 88.6±3.3 |
| Done          | 50.7±5.8                     | 53.6±6.1  | 60.7±6.4  | 70.9±6.6  | 82.6±6.0  | 97.0±3.0 |
| p-value       | < 0.001                      | < 0.001   | < 0.001   | 0.022     | 0.361     | 0.243    |

BMI, body mass index; ASA, American Society of Anesthesiologists; CIS, carcinoma *in situ*; LVI, lymphovascular invasion; LN, lymph node; ACH, adjuvant chemotherapy.

**Supplementary Table 5.** Five-year conditional overall survival rates according to clinicopathological characteristics

| Variable                  | Years survived after surgery |          |          |          |           |           |
|---------------------------|------------------------------|----------|----------|----------|-----------|-----------|
|                           | Baseline                     | 1 yr     | 2 yr     | 3 yr     | 4 yr      | 5 yr      |
| Cohort                    | 330                          | 309      | 287      | 244      | 196       | 163       |
| Age (yr)                  |                              |          |          |          |           |           |
| < 65                      | 75.7±3.3                     | 75.8±3.5 | 77.9±3.5 | 82.3±3.5 | 87.1±3.3  | 94.1±2.6  |
| ≥ 65                      | 58.2±4.3                     | 61.9±4.6 | 64.9±5.0 | 70.2±5.5 | 67.0±6.7  | 64.5±8.0  |
| p-value                   | < 0.001                      | < 0.001  | < 0.001  | < 0.001  | < 0.001   | < 0.001   |
| Sex                       |                              |          |          |          |           |           |
| Male                      | 67.4±3.1                     | 69.9±3.2 | 70.8±3.4 | 76.2±3.5 | 80.0±3.7  | 84.6±3.9  |
| Female                    | 70.0±5.8                     | 69.9±6.0 | 79.7±5.8 | 82.4±6.2 | 81.9±7.0  | 77.1±9.4  |
| p-value                   | 0.850                        | 0.462    | 0.849    | 0.920    | 0.541     | 0.354     |
| BMI (kg/m <sup>2</sup> )  |                              |          |          |          |           |           |
| < 25                      | 61.8±3.7                     | 64.8±3.9 | 66.7±4.2 | 72.1±4.5 | 76.5±4.6  | 81.9±5.1  |
| ≥ 25                      | 76.8±3.8                     | 77.0±4.0 | 80.6±4.0 | 83.8±4.1 | 82.4±5.0  | 84.0±5.3  |
| p-value                   | 0.015                        | 0.066    | 0.059    | 0.183    | 0.247     | 0.902     |
| ASA score                 |                              |          |          |          |           |           |
| 0-1                       | 68.7±4.5                     | 71.6±4.6 | 74.6±4.8 | 81.1±4.7 | 87.1±4.3  | 94.0±3.4  |
| 2-3                       | 67.5±3.4                     | 69.0±3.5 | 71.6±3.7 | 75.6±4.0 | 75.4±4.6  | 77.2±5.2  |
| p-value                   | 0.340                        | 0.153    | 0.138    | 0.132    | 0.067     | 0.041     |
| History of bladder cancer |                              |          |          |          |           |           |
| Negative                  | 71.4±2.9                     | 72.7±3.0 | 73.4±3.2 | 79.2±3.3 | 81.0±3.6  | 82.8±3.9  |
| Positive                  | 52.2±6.9                     | 57.1±7.2 | 68.8±7.6 | 69.4±8.3 | 70.1±10.4 | 84.4±10.4 |
| p-value                   | 0.005                        | 0.007    | 0.200    | 0.061    | 0.111     | 0.588     |
| Ureteroscopy              |                              |          |          |          |           |           |
| Not done                  | 66.7±3.0                     | 69.6±3.1 | 73.2±3.2 | 79.7±3.3 | 81.9±3.7  | 84.3±4.1  |
| Done                      | 73.4±6.0                     | 71.1±6.4 | 70.5±7.0 | 69.9±7.5 | 70.5±8.0  | 78.5±7.9  |
| p-value                   | 0.425                        | 0.674    | 0.664    | 0.606    | 0.480     | 0.605     |
| Concomitant CIS           |                              |          |          |          |           |           |
| Negative                  | 68.2±2.9                     | 70.7±3.0 | 73.8±3.1 | 76.9±3.3 | 80.0±2.6  | 84.0±3.8  |
| Positive                  | 66.2±8.3                     | 64.4±8.7 | 63.4±9.5 | 76.1±9.6 | 65.2±13.0 | 74.7±13.7 |
| p-value                   | 0.490                        | 0.271    | 0.197    | 0.599    | 0.118     | 0.161     |
| Hydronephrosis            |                              |          |          |          |           |           |
| Negative                  | 73.4±3.5                     | 73.8±3.6 | 76.0±3.7 | 83.1±3.6 | 86.6±3.8  | 87.6±4.3  |
| Positive                  | 61.5±4.2                     | 65.0±4.4 | 68.1±4.8 | 70.2±5.2 | 69.9±5.9  | 76.7±6.4  |
| p-value                   | 0.006                        | 0.024    | 0.141    | 0.020    | 0.016     | 0.077     |
| Multifocal tumor          |                              |          |          |          |           |           |
| Negative                  | 70.1±2.9                     | 72.0±3.0 | 74.8±3.2 | 79.2±3.3 | 81.2±3.6  | 84.3±4.0  |
| Positive                  | 56.9±7.0                     | 59.1±7.3 | 61.5±7.6 | 69.8±8.1 | 72.8±8.9  | 78.2±8.7  |
| p-value                   | 0.045                        | 0.053    | 0.054    | 0.245    | 0.784     | 0.561     |
| Location                  |                              |          |          |          |           |           |
| Renal pelvis              | 73.1±3.6                     | 76.4±3.6 | 78.2±3.8 | 84.7±3.6 | 87.3±3.7  | 89.6±4.1  |
| Ureter                    | 66.6±4.7                     | 67.0±5.0 | 68.9±5.5 | 75.6±5.5 | 77.0±6.1  | 86.7±5.7  |
| Both                      | 53.2±7.5                     | 54.4±8.0 | 60.4±8.3 | 58.6±9.3 | 59.5±10.6 | 57.5±11.8 |
| p-value                   | 0.001                        | 0.003    | 0.007    | 0.010    | 0.070     | 0.031     |
| pT stage                  |                              |          |          |          |           |           |
| ≤ pT2                     | 81.1±3.1                     | 80.3±3.3 | 80.1±3.5 | 82.4±3.5 | 82.3±4.1  | 82.0±5.0  |
| ≥ pT3                     | 51.0±4.4                     | 55.2±4.7 | 60.7±5.1 | 68.9±5.7 | 76.4±5.6  | 84.2±5.6  |
| p-value                   | < 0.001                      | < 0.001  | < 0.001  | 0.066    | 0.187     | 0.537     |
| Tumor grade               |                              |          |          |          |           |           |
| Low                       | 85.8±3.4                     | 87.7±3.4 | 87.1±3.5 | 90.8±3.4 | 89.8±3.7  | 84.9±5.5  |
| High                      | 58.3±3.6                     | 59.8±3.8 | 63.3±4.1 | 68.4±4.5 | 71.4±5.1  | 81.1±5.0  |
| p-value                   | < 0.001                      | < 0.001  | < 0.001  | < 0.001  | 0.010     | 0.088     |

Supplementary Table 5. Continued

| Variable      | Years survived after surgery |           |           |           |           |           |
|---------------|------------------------------|-----------|-----------|-----------|-----------|-----------|
|               | Baseline                     | 1 yr      | 2 yr      | 3 yr      | 4 yr      | 5 yr      |
| LVI           |                              |           |           |           |           |           |
| Negative      | 74.4±2.9                     | 75.0±3.0  | 75.9±3.1  | 79.6±3.3  | 80.3±3.7  | 81.8±4.1  |
| Positive      | 43.7±6.3                     | 48.9±6.9  | 56.5±8.0  | 66.4±8.4  | 74.5±8.5  | 90.0±6.8  |
| p-value       | < 0.001                      | 0.001     | 0.097     | 0.388     | 0.726     | 0.302     |
| Margin status |                              |           |           |           |           |           |
| Negative      | 70.5±2.7                     | 71.8±2.8  | 73.4±3.0  | 77.9±3.1  | 79.4±3.4  | 82.7±3.8  |
| Positive      | 21.2±10.4                    | 27.7±13.1 | 45.0±18.8 | 60.0±21.9 | 75.0±21.7 | 50.0±35.4 |
| p-value       | < 0.001                      | < 0.001   | 0.016     | 0.108     | 0.242     | 0.603     |
| LN status     |                              |           |           |           |           |           |
| Negative      | 69.1±2.7                     | 70.8±2.9  | 72.7±3.0  | 77.7±3.1  | 79.3±3.4  | 82.7±3.8  |
| Positive      | 41.7±13.5                    | 48.6±14.8 | 72.9±16.5 | 72.9±16.5 | 83.3±15.2 | -         |
| p-value       | 0.038                        | 0.104     | 0.781     | 0.797     | 0.825     | 0.367     |
| ACH           |                              |           |           |           |           |           |
| Not done      | 75.0±2.9                     | 76.2±3.1  | 77.1±3.3  | 79.2±3.5  | 78.1±4.1  | 78.9±4.6  |
| Done          | 47.8±5.7                     | 51.2±6.0  | 58.0±6.3  | 70.9±6.6  | 82.6±6.0  | 97.0±3.0  |
| p-value       | < 0.001                      | 0.001     | 0.007     | 0.235     | 0.966     | 0.179     |

BMI, body mass index; ASA, American Society of Anesthesiologists; CIS, carcinoma *in situ*; LVI, lymphovascular invasion; LN, lymph node; ACH, adjuvant chemotherapy.

**Supplementary Table 6.** Five-year conditional intravesical recurrence-free survival rates according to clinicopathological characteristics

| Variable                  | Years survived after surgery |           |           |           |           |           |
|---------------------------|------------------------------|-----------|-----------|-----------|-----------|-----------|
|                           | Baseline                     | 1 yr      | 2 yr      | 3 yr      | 4 yr      | 5 yr      |
| Cohort                    | 330                          | 208       | 145       | 114       | 91        | 71        |
| Age (yr)                  |                              |           |           |           |           |           |
| < 65                      | 60.4±4.0                     | 76.2±4.2  | 89.8±3.6  | 93.7±3.1  | 96.2±2.6  | 87.5±11.7 |
| ≥ 65                      | 51.7±4.7                     | 80.1±5.1  | 93.2±3.8  | 87.5±11.7 | 87.5±11.7 | -         |
| p-value                   | 0.016                        | 0.839     | 0.990     | 0.552     | 0.962     | -         |
| Gender                    |                              |           |           |           |           |           |
| Male                      | 54.1±3.5                     | 75.9±3.8  | 90.7±3.2  | 94.4±2.8  | 92.7±4.4  | 96.0±3.9  |
| Female                    | 65.0±6.3                     | 83.0±5.9  | 91.1±4.9  | -         | -         | -         |
| p-value                   | 0.143                        | 0.346     | 0.952     | -         | -         | -         |
| BMI (kg/m <sup>2</sup> )  |                              |           |           |           |           |           |
| < 25                      | 52.3±4.1                     | 77.1±4.7  | 89.9±4.1  | 93.7±3.6  | 90.7±6.8  | 93.3±6.4  |
| ≥ 25                      | 62.5±4.6                     | 77.9±4.6  | 91.8±3.5  | 97.9±2.1  | 97.9±2.1  | -         |
| p-value                   | 0.028                        | 0.804     | 0.597     | 0.157     | 0.493     | -         |
| ASA score                 |                              |           |           |           |           |           |
| 0-1                       | 57.4±5.3                     | 68.5±6.2  | 86.3±6.0  | 89.9±5.6  | 92.4±5.2  | -         |
| 2-3                       | 56.9±3.7                     | 83.0±3.6  | 93.1±2.7  | 98.7±1.3  | 95.7±4.3  | 95.7±4.3  |
| p-value                   | 0.447                        | 0.045     | 0.554     | 0.184     | 0.185     | -         |
| History of bladder cancer |                              |           |           |           |           |           |
| Negative                  | 59.4±3.3                     | 78.4±3.4  | 92.3±2.7  | 96.3±2.1  | 94.0±3.7  | 96.7±3.3  |
| Positive                  | 42.9±7.5                     | 72.4±9.8  | 82.5±9.3  | 92.9±6.9  | -         | -         |
| p-value                   | 0.009                        | 0.806     | 0.178     | 0.522     | -         | -         |
| Ureteroscopy              |                              |           |           |           |           |           |
| Not done                  | 57.4±3.4                     | 79.9±3.5  | 91.6±2.9  | 94.9±2.5  | 97.0±2.1  | -         |
| Done                      | 52.1±7.0                     | 68.7±7.6  | 88.1±6.4  | 85.7±13.2 | 85.7±13.2 | 85.7±13.2 |
| p-value                   | 0.512                        | 0.038     | 0.169     | 0.940     | 0.537     | -         |
| Concomitant CIS           |                              |           |           |           |           |           |
| Negative                  | 57.3±3.2                     | 77.8±3.3  | 91.9±2.6  | 96.7±1.9  | 95.6±3.3  | 96.9±3.1  |
| Positive                  | 46.5±11.3                    | 70.4±14.6 | 78.4±15.1 | 83.3±15.2 | 83.3±15.2 | -         |
| p-value                   | 0.378                        | 0.908     | 0.541     | 0.433     | 0.096     | -         |
| Hydronephrosis            |                              |           |           |           |           |           |
| Negative                  | 60.5±4.1                     | 82.7±4.0  | 93.7±3.1  | 94.8±3.0  | 96.1±2.7  | -         |
| Positive                  | 51.0±4.7                     | 70.5±5.3  | 86.4±4.8  | 97.4±2.5  | 92.9±6.9  | 92.9±6.9  |
| p-value                   | 0.179                        | 0.021     | 0.037     | 0.908     | 0.830     | -         |
| Multifocal tumor          |                              |           |           |           |           |           |
| Negative                  | 57.3±3.3                     | 78.6±3.5  | 91.8±2.9  | 95.1±2.4  | 93.2±4.3  | 96.0±3.9  |
| Positive                  | 52.6±7.5                     | 73.1±8.2  | 86.7±7.1  | -         | -         | -         |
| p-value                   | 0.548                        | 0.548     | 0.392     | -         | -         | -         |
| Location                  |                              |           |           |           |           |           |
| Renal pelvis              | 59.6±4.3                     | 80.2±4.4  | 91.7±3.7  | 92.8±3.5  | 90.3±5.9  | 94.4±5.4  |
| Ureter                    | 52.5±5.2                     | 72.0±5.8  | 90.2±4.7  | -         | -         | -         |
| Both                      | 54.7±8.2                     | 81.7±8.3  | 89.2±7.2  | -         | -         | -         |
| p-value                   | 0.632                        | 0.348     | 0.862     | -         | -         | -         |
| pT stage                  |                              |           |           |           |           |           |
| ≤ pT2                     | 51.7±4.0                     | 73.1±4.4  | 90.4±3.5  | 95.1±2.8  | 98.1±1.9  | -         |
| ≥ pT3                     | 63.5±4.7                     | 84.1±4.7  | 91.9±4.1  | 96.8±3.2  | 90.7±6.6  | 93.8±6.1  |
| p-value                   | 0.081                        | 0.080     | 0.973     | 0.905     | 0.424     | -         |

Supplementary Table 6. Continued

| Variable      | Years survived after surgery |           |           |          |           |          |
|---------------|------------------------------|-----------|-----------|----------|-----------|----------|
|               | Baseline                     | 1 yr      | 2 yr      | 3 yr     | 4 yr      | 5 yr     |
| Tumor grade   |                              |           |           |          |           |          |
| Low           | 59.2±5.0                     | 80.8±4.9  | 92.2±3.8  | 97.4±2.6 | 97.4±2.6  | -        |
| High          | 54.8±3.9                     | 75.7±4.2  | 90.1±3.6  | 94.8±3.0 | 93.0±5.2  | 95.0±4.9 |
| p-value       | 0.487                        | 0.301     | 0.497     | 0.256    | 0.665     | -        |
| LVI           |                              |           |           |          |           |          |
| Negative      | 54.5±3.4                     | 76.6±3.7  | 89.9±3.1  | 94.9±2.5 | 93.5±4.0  | 96.3±3.6 |
| Positive      | 65.5±6.4                     | 82.6±6.0  | 96.3±3.6  | -        | -         | -        |
| p-value       | 0.184                        | 0.654     | 0.366     | -        | -         | -        |
| Margin status |                              |           |           |          |           |          |
| Negative      | 56.5±3.1                     | 77.7±3.3  | 91.5±2.6  | 95.8±2.1 | 94.6±3.4  | 97.0±3.0 |
| Positive      | 49.7±21.6                    | 66.7±27.2 | 66.7±27.2 | -        | -         | -        |
| p-value       | 0.969                        | 0.917     | 0.067     | -        | -         | -        |
| LN status     |                              |           |           |          |           |          |
| Negative      | 55.4±3.1                     | 76.7±3.3  | 90.6±2.7  | 95.7±2.1 | 94.5±3.4  | 96.9±3.1 |
| Positive      | 84.4±10.2                    | -         | -         | -        | -         | -        |
| p-value       | 0.103                        | -         | -         | -        | -         | -        |
| ACH           |                              |           |           |          |           |          |
| Not done      | 54.1±3.5                     | 77.0±3.7  | 92.2±2.9  | 96.1±2.2 | 98.5±1.5  | -        |
| Done          | 63.0±6.4                     | 79.2±6.6  | 87.7±6.1  | 95.0±4.9 | 85.5±10.0 | 90.0±9.5 |
| p-value       | 0.079                        | 0.636     | 0.259     | 0.516    | 0.135     | -        |

BMI, body mass index; ASA, American Society of Anesthesiologists; CIS, carcinoma *in situ*; LVI, lymphovascular invasion; LN, lymph node; ACH, adjuvant chemotherapy.
